# Supplementary material for: TRAIP regulates replication fork recovery and progression via PCNA
Source: PubMed Central journal article supplement (PMC4923944; doi:10.1038/celldisc.2016.16), 2016-06-28
Supplement: celldisc201616-s9.pdf [file celldisc201616-s9.pdf]

## Supplementary Figure S9

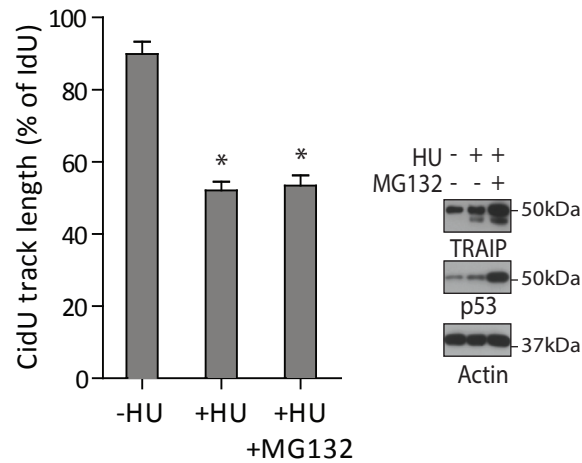

### Supplementary Figure S9

U2OS cells were pulse-labeled with IdU, treated with hydroxyurea (HU; 10mM) with or without proteasome inhibitor MG132 (10  $\mu$ M) for 2 hours, and released into fresh medium containing CldU and MG132 (10 $\mu$ M). CldU track length is shown as percentage of IdU track length. Results represent mean $\pm$ S.E.M. from three independent experiments where at least 250 structures are counted for each experiment. Statistical significance was assessed by Student's t-test (\* $p$ <0.05). Corresponding U2OS cells were lysed and immunoblotting experiments were performed using indicated antibodies. p53 was used as an indicator to monitor proteasome inhibition following MG132 treatment.
