# Supplementary material for: TRAIP regulates replication fork recovery and progression via PCNA
Source: PubMed Central journal article supplement (PMC4923944; doi:10.1038/celldisc.2016.16), 2016-06-28
Supplement: celldisc201616-s11.pdf [file celldisc201616-s11.pdf]

## Supplementary Figure S11

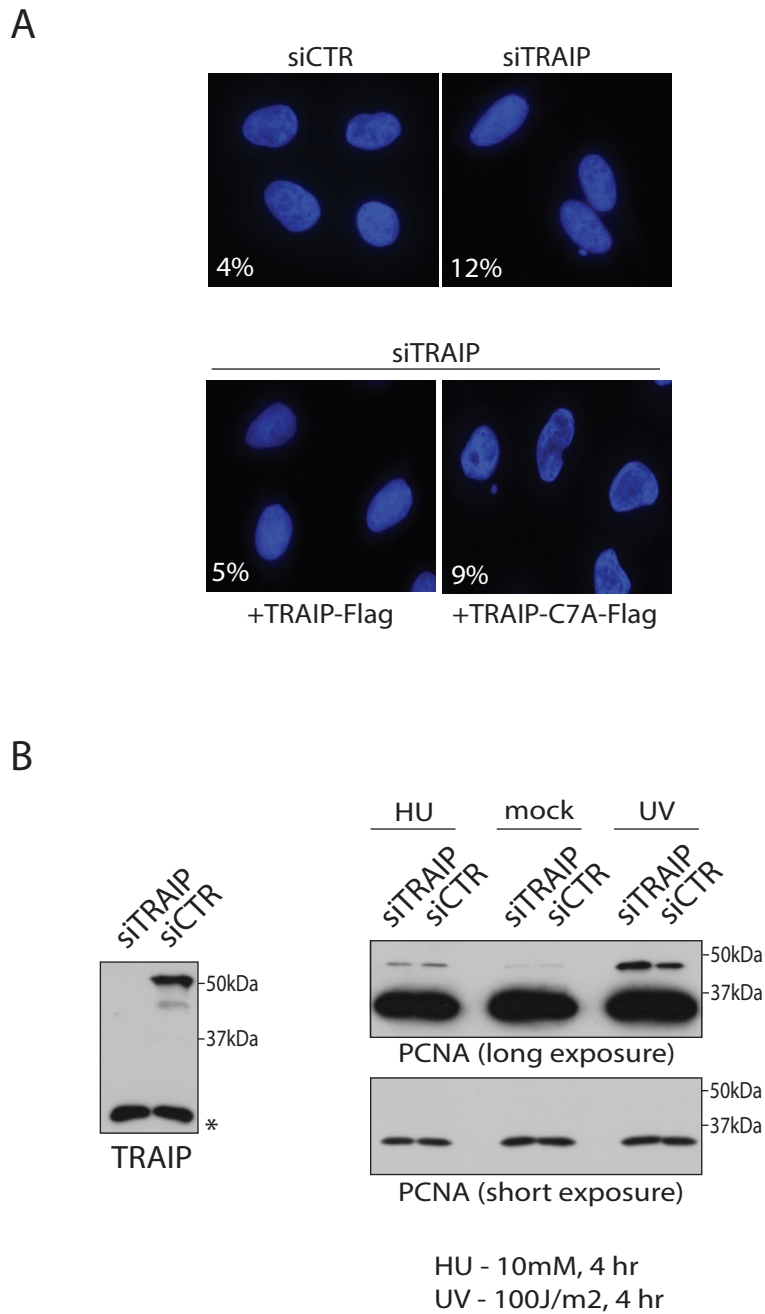

### Supplementary Figure S11

A) Micronuclei formation was scored in U2OS cells pre-treated with control siRNAs (siCTR), TRAIIP-targeting siRNAs (siTRAIP), or in TRAIIP-depleted cells reconstituted with wildtype TRAIIP or its RING mutant (C7A). Percentages of cells with micronuclei is shown and were derived from three independent experiments, n=100; B) U2OS cells pre-treated with indicated siRNAs were subjected to HU, UV or mock treatment. Cells were subsequently lysed for Western blotting experiments to determine PCNA expression and PCNA mono-ubiquitylation. Efficiency of TRAIIP knockdown was assayed by anti-TRAIIP labeling.
